# Supplementary material for: Nutritive Value and Bioactivities of a Halophyte Edible Plant: Crithmum maritimum L. (Sea Fennel)
Source: MDPI journal article supplement (doi:10.3390/plants13030427), 2024-01-31
Supplement: s1 [file s1]

*Supplementary material - Plants*

Nutritive value and bioactivities of a halophyte edible plant: *Crithmum*  
*maritimum* L. (sea-fennel)

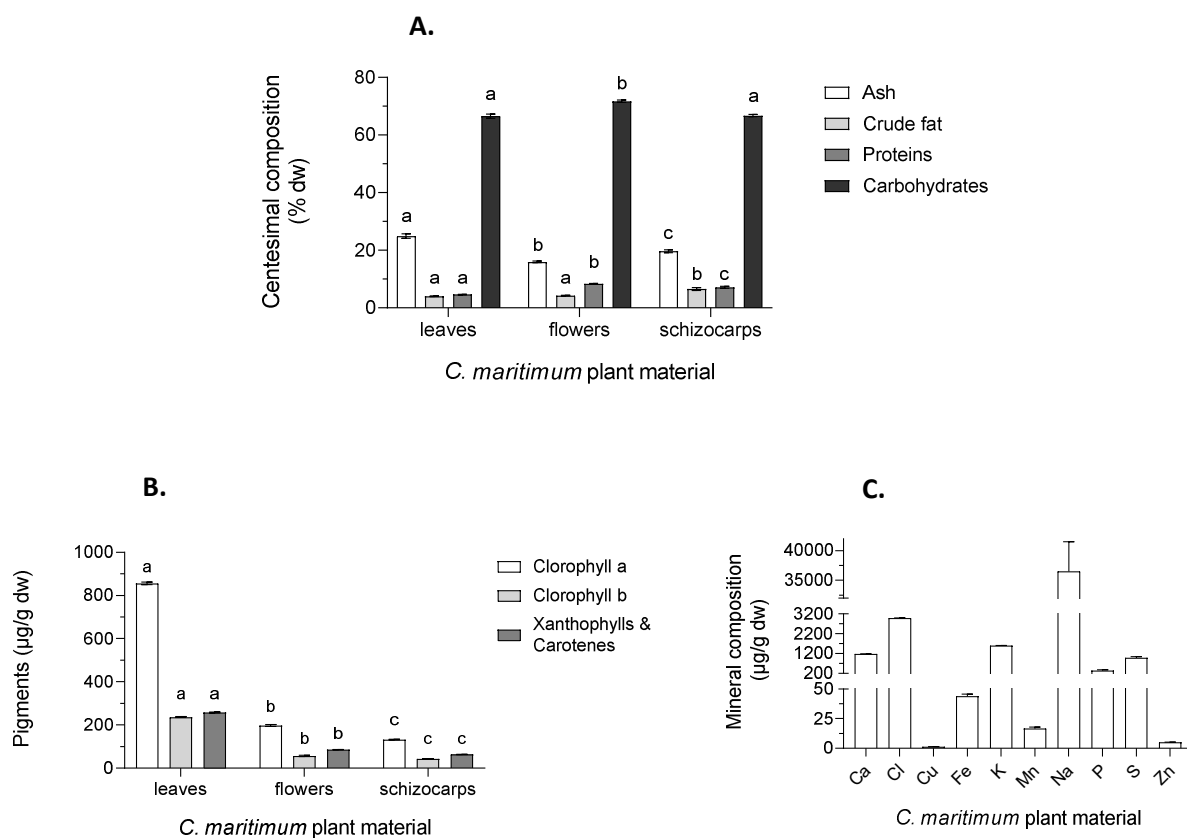

**Figure S1.** *C. maritimum* centesimal composition and contents in pigments and minerals. (A) Centesimal composition of sea fennel leaves, flowers, and fruits/schizocarps (in % dw). (B) Contents in photosynthetic pigments (Chlorophyll a and Chlorophyll b), xanthophylls and carotenes (in µg/g dw). (C) Mineral composition of whole aerial parts in Ca, Cl, Cu, Fe, K, Mn, Na, P, S and Zn (in µg/g dw). One-way ANOVAs were applied to analyse differences between the different types of plant material in (A) and (B). Different letters across the columns mean significant differences ( $p < 0.05$ ).

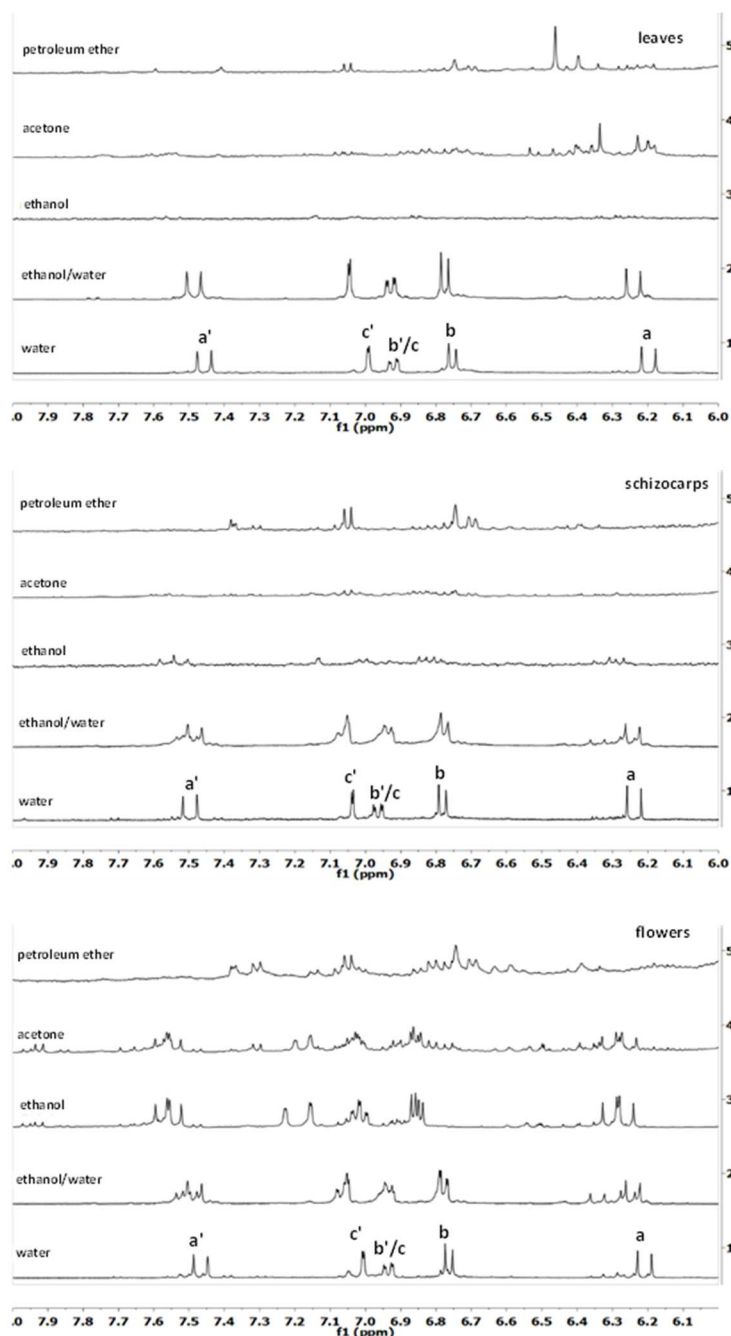

**Figure S2.** Downfield aromatic regions ( $\delta$  6.0 to 8.0 ppm) of 1D  $^1\text{H}$  NMR spectra of extracts of leaves (A), fruits/schizocarps (B), and flowers (C) of *C. maritimum* L. (sea fennel) in petroleum ether, acetone, ethanol, 1:1 ethanol/water and water populated by doublet signals (d), assigned to meta- and ortho-coupled protons of phenolic moieties and vinyl groups of hydroxybenzoic and hydroxycinnamic acids: (chemical shift ( $\delta$ ), multiplicity, vicinal coupling constant ( $^3J$ )): (a') 7.50 (d,  $J = 15.9$  Hz), (c') 7.00 (d,  $J = 2.0$  Hz), (b' and c) 6.95 (dd,  $J = 8.4$  Hz,  $2.0$  Hz), (b) 6.80 (d,  $J = 8.4$  Hz), (a) 6.25 (d,  $J = 15.9$  Hz).

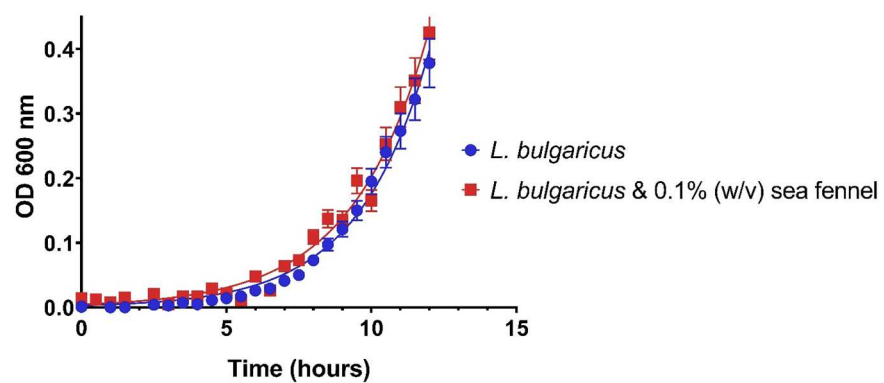

**Figure S3.** *Lactobacillus bulgaricus* growth curves. Bacterial growth monitored via optical density (OD) at 600 nm for 12 h, at 37 °C, in the absence and presence of *C. maritimum* (sea fennel) leaves at 0.1 % (w/v).
